# Supplementary material for: Synthesis of ZnIn2S4@Co3S4 particles derived from ZIF-67 for photocatalytic hydrogen production
Source: Royal Society of Chemistry journal article supplement (doi:10.1039/d0ra10799a), 2021-01-01
Supplement: d0ra10799a1.pdf [file d0ra10799a1.pdf]

## Supporting Information

### Synthesis of $\text{ZnIn}_2\text{S}_4@\text{Co}_3\text{S}_4$ particles derived from ZIF-67 for photocatalytic hydrogen production

Ganyu Wang<sup>a,b</sup>, Wenqian Chen<sup>a,b\*</sup>, Yu Zhang<sup>a,b</sup>, Qinshang Xu<sup>a,b</sup>, Yirui Li<sup>a,b</sup>, Maw Lin Foo<sup>c</sup>, Liang Tang<sup>a,b\*</sup>

<sup>a</sup> Key Laboratory of Organic Compound Pollution Control Engineering, Ministry of Education, Shanghai 200444, PR China

<sup>b</sup> School of Environmental and Chemical Engineering, Shanghai University, Shanghai 200444, PR China

<sup>c</sup> Department of Chemistry, National University of Singapore, 117543, Singapore

\* Corresponding author. E-mail addresses: [wenqianchen@shu.edu.cn](mailto:wenqianchen@shu.edu.cn) (W. Q. Chen), [tangliang@shu.edu.cn](mailto:tangliang@shu.edu.cn) (L. Tang)

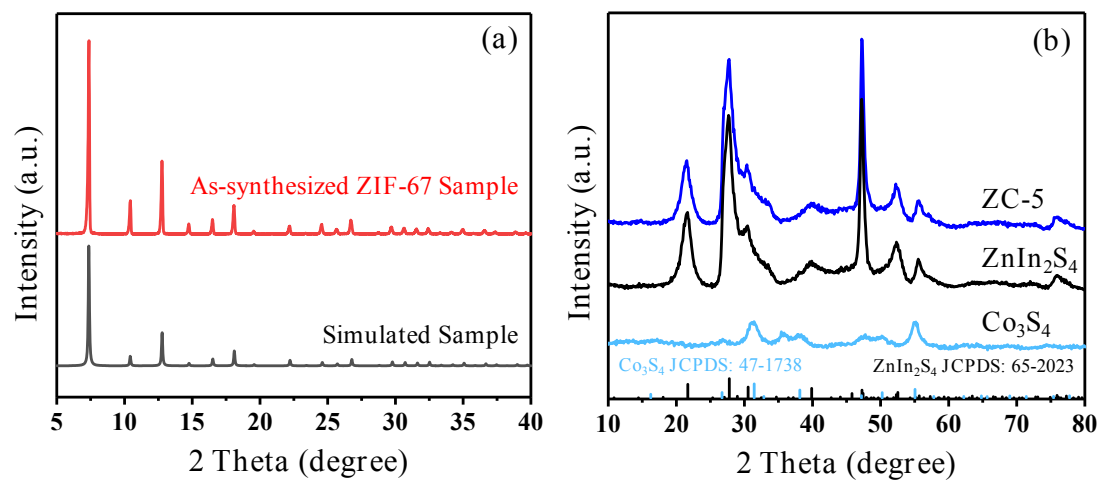

**Fig. S1** XRD patterns of samples ZIF-67 (a), ZC-5, ZnIn<sub>2</sub>S<sub>4</sub> and Co<sub>3</sub>S<sub>4</sub> (b).

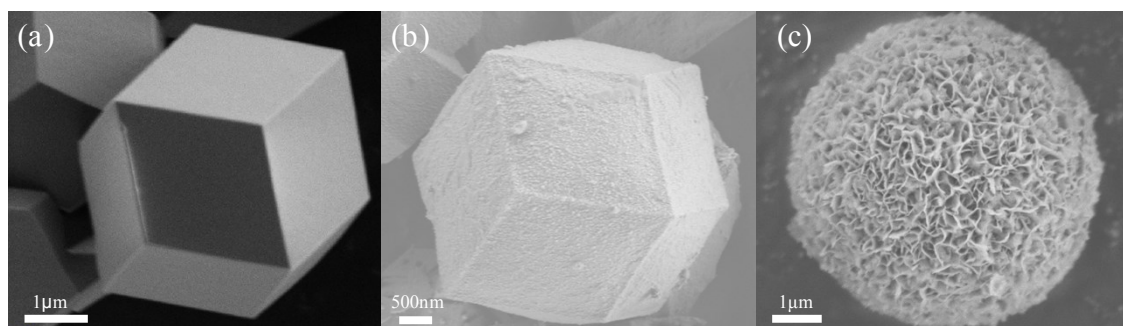

**Fig. S2** SEM images of prepared ZIF-67 (a), Co<sub>3</sub>S<sub>4</sub> (b) and pure ZnIn<sub>2</sub>S<sub>4</sub> (c).

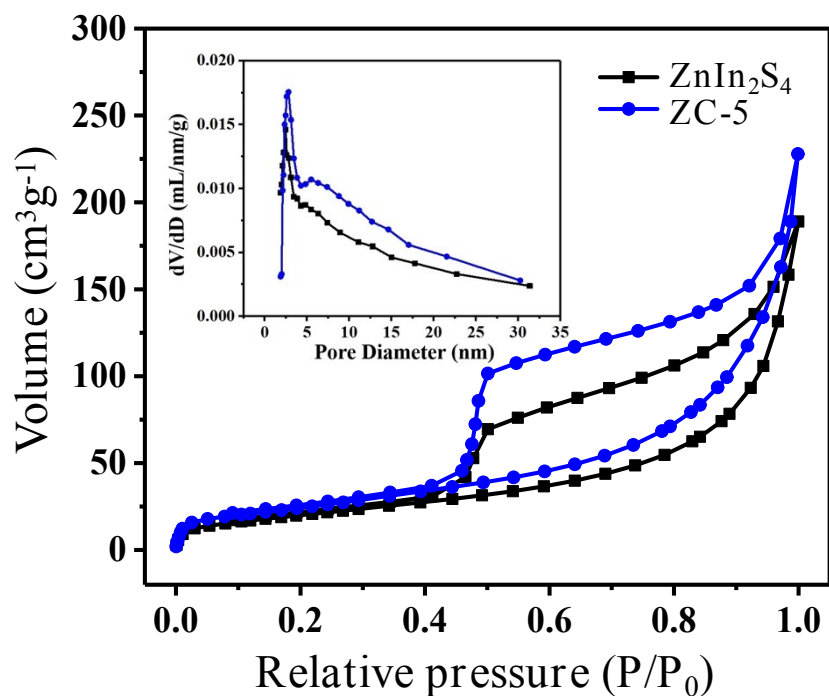

**Fig. S3**  $N_2$  adsorption-desorption isotherms of pure  $ZnIn_2S_4$  and ZC-5 composite. Inset: the corresponding BJH pore-size distribution plots calculated from the desorption branch.

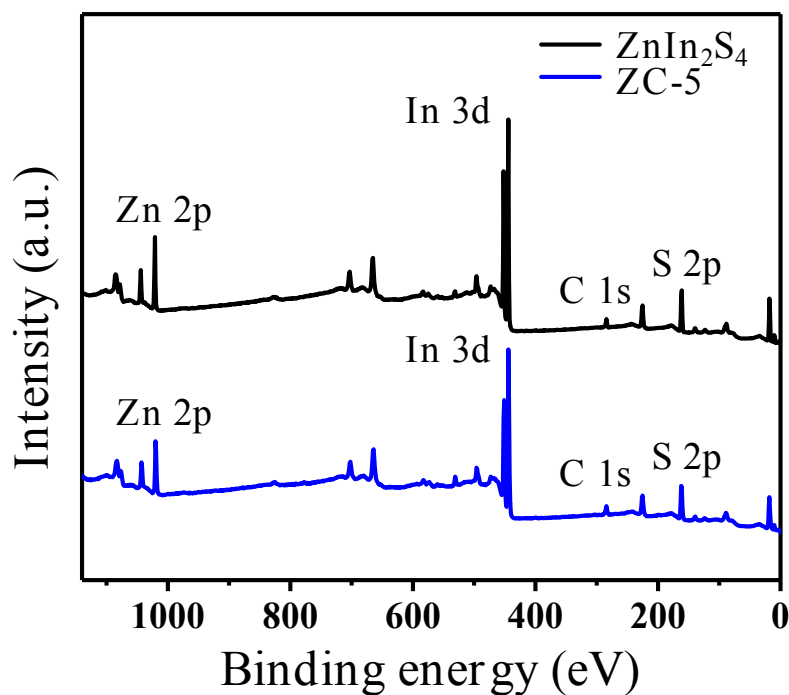

**Fig. S4** Wide-scan XPS spectra of pure  $ZnIn_2S_4$  and ZC-5.

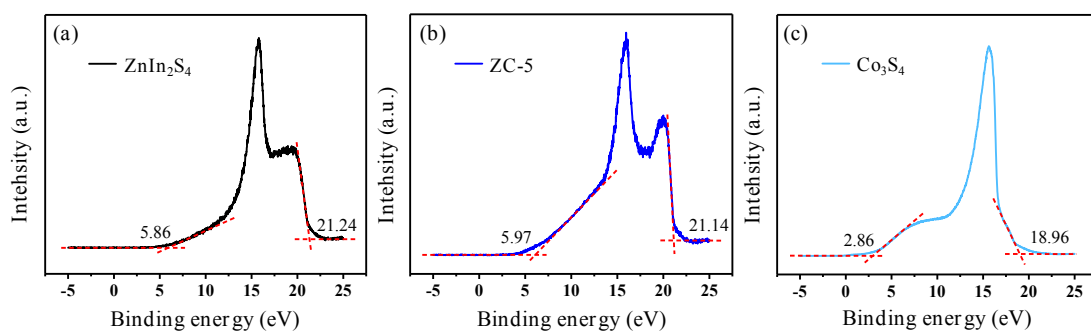

**Fig. S5** UPS spectra of pure ZnIn<sub>2</sub>S<sub>4</sub> (a), ZC-5 (b) and Co<sub>3</sub>S<sub>4</sub> (c).

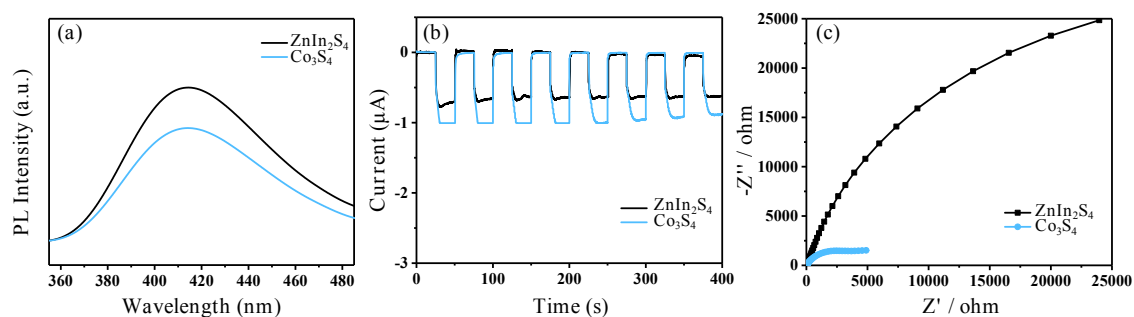

**Fig. S6** Photo-luminescence (PL) spectra of ZnIn<sub>2</sub>S<sub>4</sub> and Co<sub>3</sub>S<sub>4</sub> (a); Photocurrent-time curves of ZnIn<sub>2</sub>S<sub>4</sub> and Co<sub>3</sub>S<sub>4</sub> under the irradiation of simulated sunlight (b); Nyquist impedance plots of EIS for ZnIn<sub>2</sub>S<sub>4</sub> and Co<sub>3</sub>S<sub>4</sub> (c).

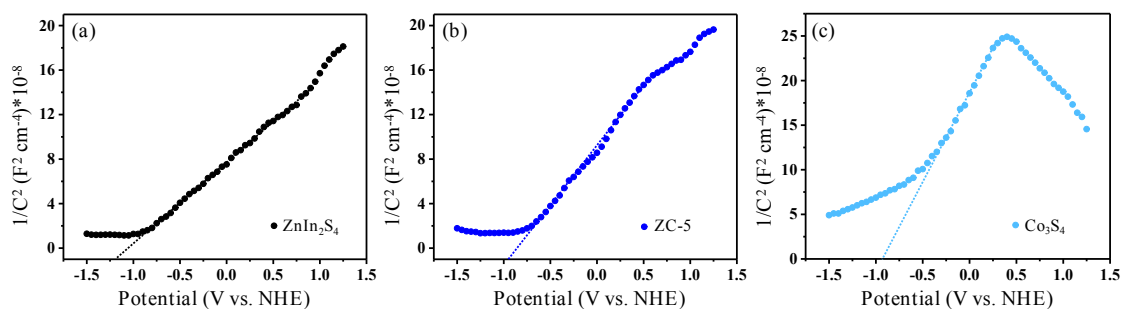

**Fig. S7** Mott-Schottky plots for ZnIn<sub>2</sub>S<sub>4</sub> (a), ZC-5 (b) and Co<sub>3</sub>S<sub>4</sub> (c) in 0.5 M Na<sub>2</sub>SO<sub>4</sub> aqueous solution.

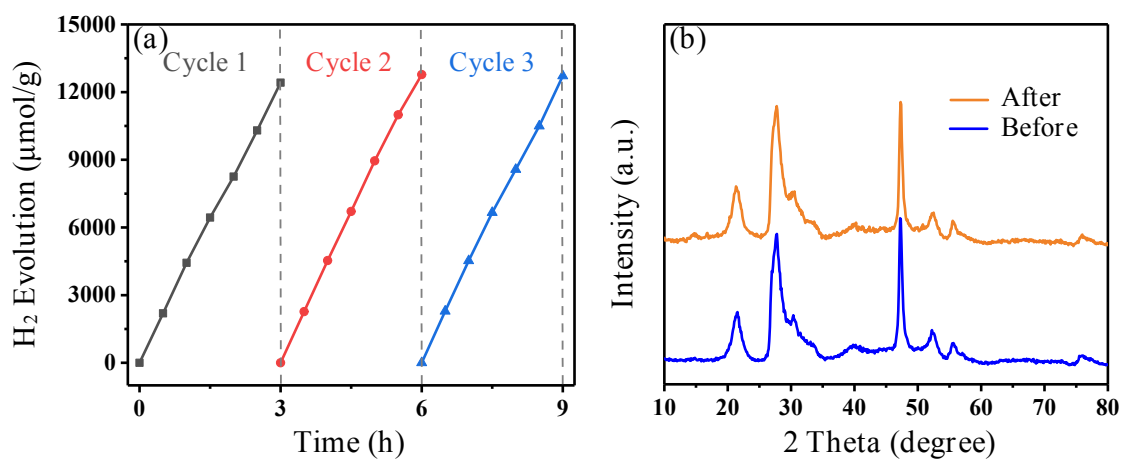

**Fig. S8** Photocatalytic hydrogen evolution over the ZC-5 photocatalyst for three cycles (a); The XRD patterns of ZC-5 before and after photocatalytic reaction (b).
